# Supplementary material for: Highly flexible and transparent film heaters based on polyimide films embedded with silver nanowires
Source: Royal Society of Chemistry journal article supplement (doi:10.1039/c5ra06529a), 2015-01-01
Supplement: c5ra06529a1.pdf [file c5ra06529a1.pdf]

# **Supporting Information**

## **Highly Flexible and Transparent Film Heaters based on Silver Nanowires Embedded in Transparent Polyimide Film**

<sup>a</sup> Ningbo Institute of Material Technology and Engineering, Chinese Academy of Sciences,

Ningbo, Zhejiang 315201, China

<sup>b</sup> Faculty of Information Science and Engineering, Ningbo University, Ningbo, Zhejiang

315211, China

\*Address correspondence to: wfshen@nimte.ac.cn (W. Shen); weijiesong@nimte.ac.cn (W. Song).

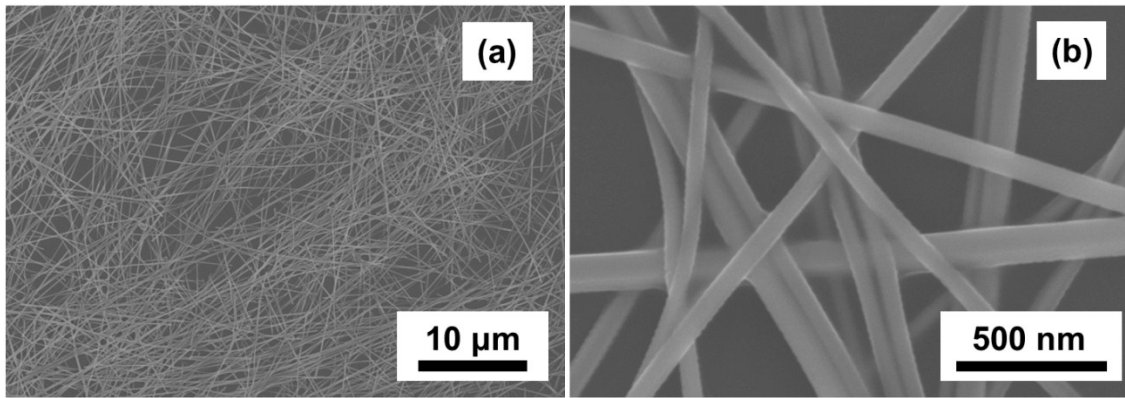

Figure S1 SEM images of the AgNWs.

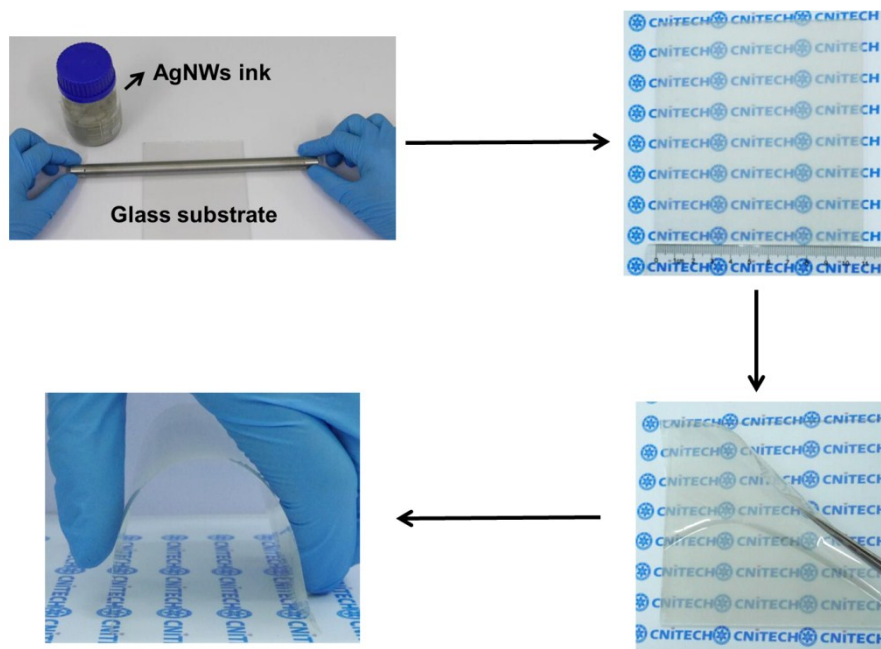

Figure S2 The photograph of fabrication processes of 10 cm × 10 cm AgNW/PI TFH.

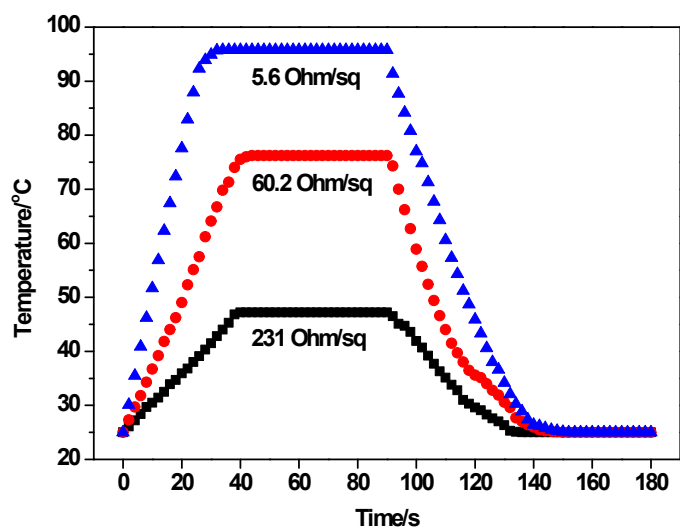

Figure S3 Temperature profiles of the AgNW/PI TFHs with the different sheet resistance under operation at a fixed input voltage of 6 V.

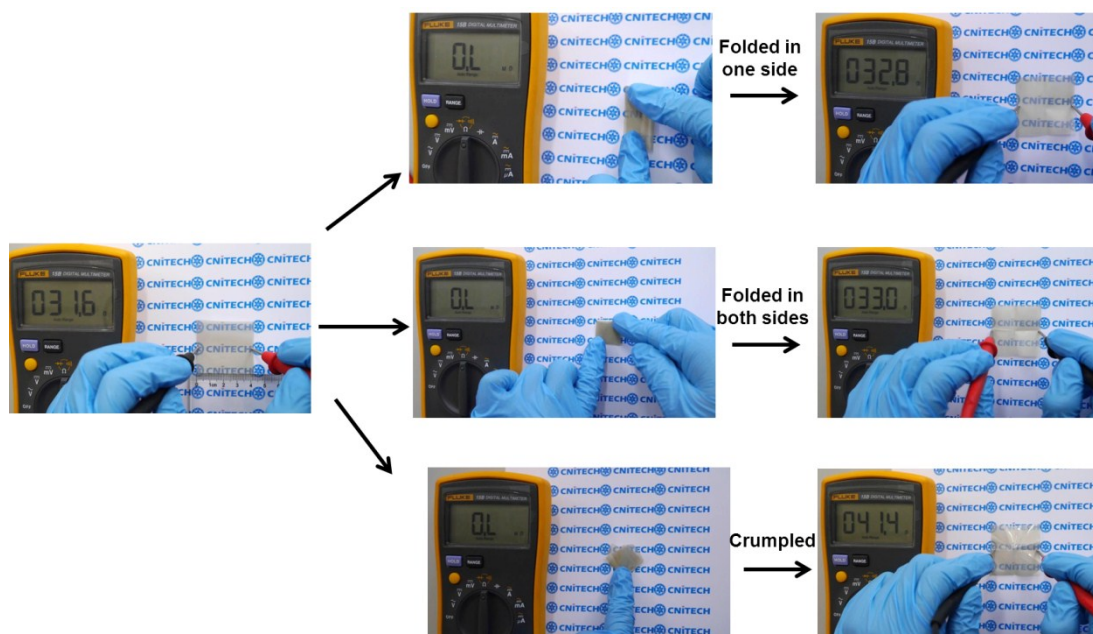

Figure S4 Sheet resistance changes of the AgNW/PI TFHs under the extreme conditions of folding and crumpling

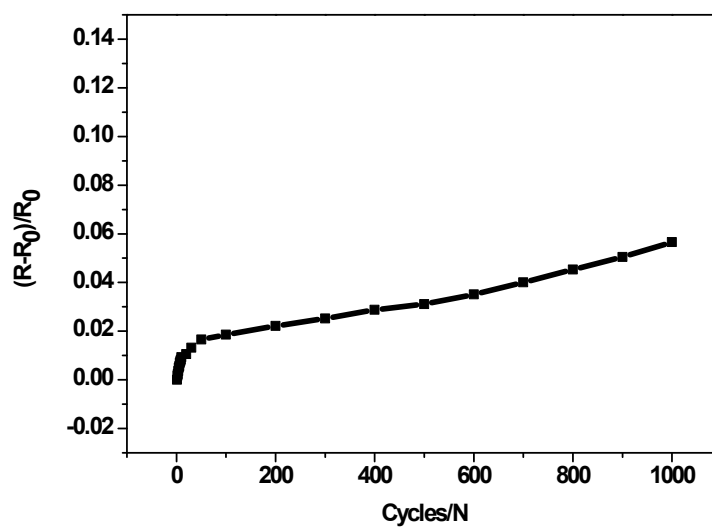

Figure S5 Sheet resistance change of the AgNW/PI TFH after repeated sticking and peeling.

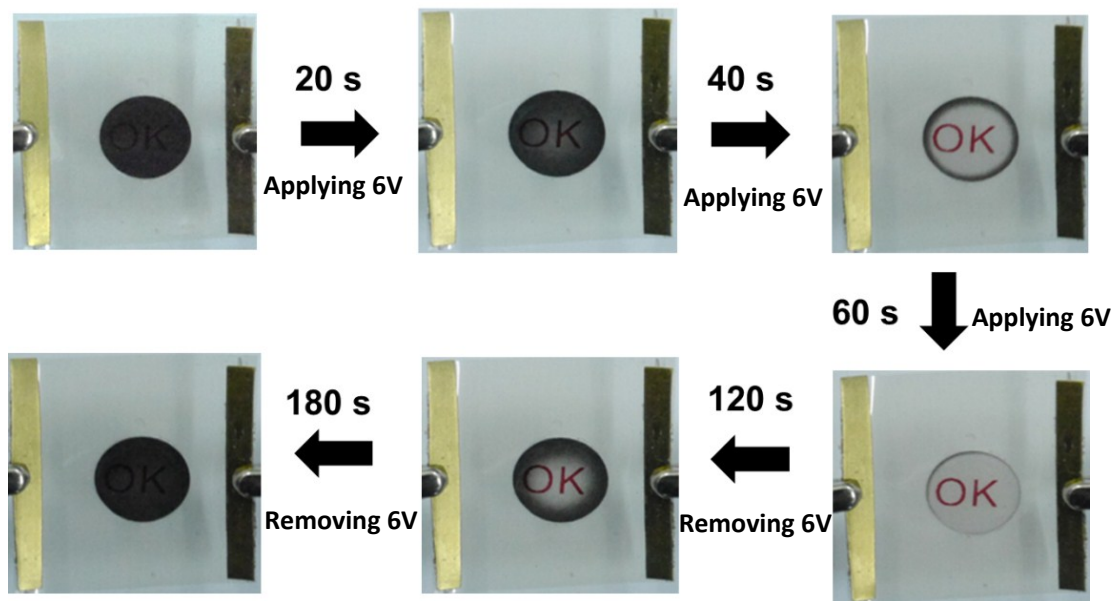

Figure S6 Thermochromic behavior of symbol with the AgNW/PI TFHs applying and removing a voltage of 6 V.
